# Supplementary material
Source: MDPI journal article supplement (https://www.mdpi.com/2073-4395/12/7/1645)
Supplement: s1 [file s1]

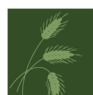

**Table S1.** List of the primers and probes used for LAMP, RPA and real-time PCR.

| Gene                              | Organism                      | Primer    | Sequence (5'-3')                                              | Technique     | Reference                       |
|-----------------------------------|-------------------------------|-----------|---------------------------------------------------------------|---------------|---------------------------------|
| 16 rRNA*                          | Flavescence dorée phytoplasma | 16S-F3    | CGTGTCGTGAGATGTTAGGTTAAG                                      | LAMP          | Kogovšek <i>et al.</i> , 2005   |
|                                   |                               | 16S-FL    | ACCATTACGTGCTGGCAACTAG                                        |               |                                 |
|                                   |                               | 16S-FIP   | TATCCCCACCTTCCTCCAATGTTTAAT<br>TCTAAAACGAACGCAACCCC           |               |                                 |
|                                   |                               | 16S-B3    | CGCGATTACTAGCGATTCCAG                                         |               |                                 |
|                                   |                               | 16S-BL    | GCTACAAACGTGATACAATGGCTA                                      |               |                                 |
|                                   |                               | 16S-BIP   | TCAAATCATCATGCCCCTTATGATCT<br>GGCAGACTTCAATCCGTACTGAGACT<br>A |               |                                 |
| <i>map</i>                        | Flavescence dorée phytoplasma | mapFD-F   | TCAAGGCTTCGGBGGTTATA                                          |               | Pelletier <i>et al.</i> , 2009  |
|                                   |                               | mapFD-R   | TTGTTTTAGAAGGTAATCCGTGAACTA<br>C                              |               |                                 |
|                                   |                               | mapFD-FAM | FAM-TTGTATTTTCAGTGAATGAAG                                     |               |                                 |
| mitochondria l 16S mtDNA          | <i>Scaphoideus titanus</i>    | Stit16S_F | CTCCCCATTAAAATTACGCTGTT                                       | real-time PCR | Gallmetzer <i>et al.</i> , 2020 |
|                                   |                               | Stit16S_R | CATGTATATTTGATCCTTTTGGAAAGTA<br>AG                            |               |                                 |
|                                   |                               | Stit16S_P | NED-TCCCTAAGGTAATTTTG                                         |               |                                 |
| chloroplast <i>trnL</i> -F spacer | Grapevine                     | VITIS_F   | AAATTCAGGGAAACCCTGGAA                                         |               | Pelletier <i>et al.</i> , 2009  |
|                                   |                               | VITIS_R   | CCCTTGTTGTTTTCGGAAA                                           |               |                                 |
|                                   |                               | VITIS_NED | NED-CTGAGCCAAATCC                                             |               |                                 |

\*Primers used in LAMP 2 assay, while in LAMP 1 and RPA assays the primers are not publicly available and are provided in commercial kits.

**Table S2.** Flavesence dorée phytoplasma (FDp) detection in laboratory-reared *Scaphoideus titanus* crude extracts by LAMP and real-time PCR assays.

| Isolate | Host/pathogen*                                              | Stage                  | LAMP<br>Tp (min±SD) | Real-time PCR<br>Ct±SD |
|---------|-------------------------------------------------------------|------------------------|---------------------|------------------------|
| St_114  | <i>Scaphoideus titanus</i> reared on bean infected by FDp-D | Adult                  | 6.28±0.16           | 30±4                   |
| St_115  |                                                             |                        | 5.41±0.09           | 24.8±0.5               |
| St_116  |                                                             |                        | 7.15±0.01           | 24.14±0.07             |
| St_117  |                                                             |                        | 7.46±0.01           | 24.77±0.21             |
| St_118  |                                                             |                        | 7.6±0.4             | 24.13±0.28             |
| St_129  |                                                             |                        | nd                  | nd                     |
|         |                                                             | <b>Mean value±SD</b>   | <b>6.8±0.9</b>      | <b>25.5±2.4</b>        |
| St_119  |                                                             | 5 <sup>th</sup> instar | 6.18±0.11           | 25.54±0.18             |
| St_120  |                                                             |                        | 6.8±0.4             | 24.78±0.12             |
| St_121  |                                                             |                        | 11.5±0.4            | 33.5±0.9               |
| St_122  |                                                             |                        | 7.7±0.4             | 24.01±0.14             |
| St_123  |                                                             |                        | 7.22±0.09           | 23.4±0.4               |
| St_130  |                                                             |                        | nd                  | nd                     |
|         |                                                             | <b>Mean value±SD</b>   | <b>7.9±2.1</b>      | <b>26±4</b>            |
| St_131  |                                                             | 4 <sup>th</sup> instar | 9.04±1.05           | 28.1±0.8               |
| St_132  |                                                             |                        | 8.0±0.4             | 27.8±0.8               |
| St_133  |                                                             |                        | 7.14±0.09           | 24.6±0.9               |
| St_134  |                                                             |                        | 7.12±0.03           | 24.5±0.4               |
| St_167  |                                                             |                        | nd                  | nd                     |
| St_179  |                                                             |                        | nd                  | nd                     |
|         |                                                             | <b>Mean value±SD</b>   | <b>7.8±0.9</b>      | <b>26.2±2.0</b>        |
|         |                                                             |                        | nd                  |                        |
| St_124  |                                                             |                        | nd                  | nd                     |
|         |                                                             | Adult                  |                     |                        |
| St_125  | <i>S. titanus</i> reared on bean infected by FDp-C          |                        | 6.28±0.13           | 24.7±0.8               |
| St_126  |                                                             |                        | 6.05±0.04           | 24.5±0.4               |
| St_127  |                                                             |                        | 6.1±1.2             | nd                     |
| St_128  |                                                             |                        | 7.73±0.20           | 25.6±1.0               |
| St_168  |                                                             |                        | nd                  | nd                     |
|         |                                                             | <b>Mean value±SD</b>   | <b>6.5±0.8</b>      | <b>24.9±0.6</b>        |
| St_173  |                                                             | 5 <sup>th</sup> instar | nd                  | nd                     |
| St_174  |                                                             |                        | nd                  | nd                     |
| St_175  |                                                             |                        | nd                  | nd                     |
| St_176  |                                                             |                        | 10.9±0.5            | nd                     |
| St_177  |                                                             |                        | nd                  | nd                     |
| St_178  |                                                             |                        | nd                  | nd                     |
|         |                                                             | <b>Mean value±SD</b>   | <b>10.9±0.5</b>     | <b>nd</b>              |
| St_169  |                                                             | 4 <sup>th</sup> instar | nd                  | nd                     |
| St_170  |                                                             |                        | 11.55±0.21          | nd                     |
| St_171  |                                                             |                        | nd                  | nd                     |
| St_172  |                                                             |                        | nd                  | nd                     |
| St_180  |                                                             |                        | nd                  | nd                     |
| St_181  |                                                             |                        | nd                  | nd                     |
|         |                                                             | <b>Mean value±SD</b>   | <b>11.55±0.21</b>   | <b>nd</b>              |
| St_73   | <i>S. titanus</i> reared on the healthy grapevine           | Adult                  | nd                  | nd                     |
| St_74   |                                                             |                        | nd                  | nd                     |
| St_86   |                                                             | 5 <sup>th</sup> instar | nd                  | nd                     |

|       |                        |    |    |
|-------|------------------------|----|----|
| St_87 |                        | nd | nd |
| St_91 | 4 <sup>th</sup> instar | nd | nd |
| St_98 |                        | nd | nd |

\* For each sample, the mean values of Time to positive (Tp) and threshold cycle (Ct) are reported and referred to five-fold diluted crude extracts for both assays. SD = standard deviation; nd = not detected.

**Table S3.** In laboratory detection of Flavescence dorée phytoplasma (FDp) from crude extracts of field-captured *Scaphoideus titanus* and infected grapevine plants by LAMP and real-time PCR assays.

| Isolate       | Host/pathogen*                                | Stage                      | Locality and collection date   | LAMP         | Real-time PCR |
|---------------|-----------------------------------------------|----------------------------|--------------------------------|--------------|---------------|
|               |                                               |                            |                                | Tp (min±SD)* | Ct±SD**       |
| St_140        |                                               |                            |                                | 10.4±0.4     | 24.27±0.15    |
| St_141        |                                               |                            |                                | 12.6±2.3     | 35.3±1.0      |
| St_142        |                                               |                            |                                | 17±5         | 35.6±0.8      |
| St_143        |                                               |                            |                                | 17±5         | nd***         |
| St_144        |                                               |                            |                                | nd           | nd            |
| St_145        |                                               |                            |                                | 12.5±2.5     | 35.8±0.4      |
| St_146        |                                               |                            |                                | nd           | nd            |
| St_147        |                                               |                            |                                | nd           | nd            |
| St_148        |                                               |                            |                                | 16±4         | nd            |
| St_149        |                                               |                            |                                | 17±4         | nd            |
| St_150        |                                               |                            |                                | 18±4         | nd            |
| St_153        |                                               |                            |                                | 17±5         | nd            |
| St_154        |                                               |                            |                                | nd           | nd            |
| St_155        |                                               |                            |                                | nd           | nd            |
| St_156        | <i>Scaphoideus</i><br>captured in<br>vineyard | <i>titanus</i><br>infected | Giaglione (TO). August 2. 2021 | nd           | nd            |
| St_157        |                                               | Adult                      |                                | 13±3         | nd            |
| St_158        |                                               |                            |                                | nd           | nd            |
| St_159        |                                               |                            |                                | nd           | nd            |
| St_160        |                                               |                            |                                | 12.6±1.0     | 24.68±0.24    |
| St_161        |                                               |                            |                                | nd           | nd            |
| St_162        |                                               |                            |                                | nd           | nd            |
| St_163        |                                               |                            |                                | 9.6±1.5      | nd            |
| St_164        |                                               |                            |                                | nd           | nd            |
| St_165        |                                               |                            |                                | nd           | nd            |
| St_166        |                                               |                            |                                | 12.5±2.5     | 35.3±0.5      |
| St_A          |                                               |                            |                                | 12.42±0.21   | 33.6±1.8      |
| St_C1         |                                               |                            |                                | 12.4±0.9     | 29.3±2.0      |
| St_C2         |                                               |                            |                                | nd           | nd            |
| St_C3         |                                               |                            |                                | nd           | nd            |
| St_C4         |                                               |                            |                                | nd           | nd            |
| St_C5         |                                               |                            |                                | 12.22±0.08   | 31.8±0.9      |
| Mean value±SD |                                               |                            |                                | 13.9±2.6     | 32±5          |
| St_151        |                                               |                            |                                | 17±4         | nd            |
| St_142        | <i>Scaphoideus</i><br>captured in<br>vineyard | <i>titanus</i><br>infected | Giaglione (TO). August 2. 2021 | nd           | nd            |
| St_C6         |                                               | 5 <sup>th</sup> instar     |                                | 12.0±1.1     | 29.2±1.2      |
| St_C7         |                                               |                            |                                | 12.4±0.7     | 29.9±0.8      |
| St_C8         |                                               |                            |                                | 11.1±1.2     | 30.5±1.2      |

|        |                                     |            |                     |                        | Mean value±SD                     | 13.1±2.5   | 29.9±0.7   |
|--------|-------------------------------------|------------|---------------------|------------------------|-----------------------------------|------------|------------|
| St_152 | Scaphoideus<br>captured<br>vineyard | in         | titanus<br>infected | 4 <sup>th</sup> instar | Giaglione (TO). August 2. 2021    | nd         | nd         |
| St_C9  |                                     |            |                     |                        |                                   | nd         | nd         |
| St_C10 |                                     |            |                     |                        |                                   | 12.2±1.5   | 32.4±0.7   |
|        |                                     |            |                     |                        | Mean value±SD                     | 12.0±1.5   | 32.4±0.7   |
| St_B   |                                     |            |                     |                        |                                   | 16.21±0.24 | 34.4±1.5   |
| St_F1  |                                     |            |                     |                        |                                   | nd         | nd         |
| St_F2  |                                     |            |                     |                        |                                   | 12.3±1.1   | 28.8±0.9   |
| St_F3  |                                     |            |                     |                        |                                   | nd         | nd         |
| St_F4  |                                     |            |                     |                        |                                   | nd         | nd         |
| St_F5  |                                     |            |                     |                        |                                   | nd         | nd         |
| St_F6  |                                     |            |                     |                        |                                   | 17±6       | 32.6±0.4   |
| St_F7  |                                     |            |                     |                        |                                   | 13.1±0.5   | 26.4±0.6   |
| St_F8  |                                     |            |                     |                        |                                   | nd         | nd         |
| St_F9  |                                     |            |                     |                        |                                   | 11.1±2.0   | 27.3±0.5   |
| St_F10 | Scaphoideus<br>captured<br>vineyard | in         | titanus<br>infected | Adul<br>t              | Giaglione (TO). September 3. 2021 | nd         | nd         |
| St_F11 |                                     |            |                     |                        |                                   | 16.09      | 29.5±0.6   |
| St_F12 |                                     |            |                     |                        |                                   | nd         | nd         |
| St_F13 |                                     |            |                     |                        |                                   | nd         | nd         |
| St_F14 |                                     |            |                     |                        |                                   | 11.38      | 25.11±0.43 |
| St_F15 |                                     |            |                     |                        |                                   | 13.64      | 26.28±0.17 |
| St_F16 |                                     |            |                     |                        |                                   | nd         | nd         |
| St_F17 |                                     |            |                     |                        |                                   | nd         | nd         |
| St_F18 |                                     |            |                     |                        |                                   | nd         | nd         |
| St_F19 |                                     |            |                     |                        |                                   | nd         | nd         |
| St_F20 |                                     |            |                     |                        |                                   | nd         | nd         |
| St_F21 |                                     |            |                     |                        |                                   | 11.56      | 27.22±0.64 |
| St_F22 |                                     |            |                     |                        |                                   | 10.09      | 24.32±0.58 |
|        |                                     |            |                     |                        | Mean value±SD                     | 13.3±2.5   | 28±3       |
| D1     | Scaphoideus<br>captured<br>vineyard | in         | titanus<br>infected | Adult                  | Canale (CN). July 30. 2021        | 18.95±0.15 | 34.2±1.6   |
| D2     |                                     |            |                     |                        |                                   | 12.70±0.12 | 32.4±0.7   |
| D3     |                                     |            |                     |                        |                                   | nd         | nd         |
|        |                                     |            |                     |                        | Mean value±SD                     | 16±4       | 33.3±1.2   |
| D4     |                                     |            |                     |                        |                                   | nd         | nd         |
| D5     |                                     |            |                     |                        |                                   | 10.4±0.4   | 27.3±0.6   |
| D6     |                                     |            |                     |                        |                                   | nd         | nd         |
| D7     |                                     |            |                     |                        |                                   | 8.7±0.9    | 26.0±0.8   |
| D8     |                                     |            |                     |                        |                                   | 10.98±0.03 | 25.1±1.4   |
| D9     | Scaphoideus<br>captured<br>vineyard | in         | titanus<br>infected | 5 <sup>th</sup> instar | Canale (CN). July 30. 2021        | nd         | nd         |
| D10    |                                     |            |                     |                        |                                   | 10.03±0.11 | 30.5±0.4   |
| D11    |                                     |            |                     |                        |                                   | nd         | nd         |
| D12    |                                     |            |                     |                        |                                   | 9.6±0.4    | 31.1±0.9   |
| D13    |                                     |            |                     |                        |                                   | nd         | nd         |
| D14    |                                     |            |                     |                        |                                   | 12±4       | 27.8±1.1   |
| E1     |                                     |            |                     |                        |                                   | nd         | nd         |
| E2     | 10.3±1.2                            | 26.67±0.29 |                     |                        |                                   |            |            |
|        |                                     |            |                     |                        | Mean value±SD                     | 10.4±1.2   | 27.8±2.3   |
| E3     |                                     |            |                     | 4 <sup>th</sup> instar | Canale (CN). July 30. 2021        | nd         | nd         |

|                      |                    |           |                        |                |                                    |             |             |
|----------------------|--------------------|-----------|------------------------|----------------|------------------------------------|-------------|-------------|
| E4                   |                    |           |                        |                |                                    | 8.2±0.4     | 30.7±0.6    |
| E5                   |                    |           |                        |                |                                    | nd          | nd          |
| E6                   |                    |           |                        |                |                                    | nd          | nd          |
| E7                   |                    |           |                        |                |                                    | 9.8±0.8     | 29.9±1.9    |
| E8                   |                    |           |                        |                |                                    | 6.5±0.4     | 26.1±0.4    |
| E9                   |                    |           |                        |                |                                    | nd          | nd          |
| E10                  |                    |           |                        |                |                                    | 6.8±0.4     | 24.0±0.4    |
| E11                  |                    |           |                        |                |                                    | nd          | nd          |
| E12                  |                    |           |                        |                |                                    | nd          | nd          |
| H1                   |                    |           |                        |                |                                    | 17.2±0.8    | 32.2±0.9    |
| H2                   |                    |           |                        |                |                                    | nd          | nd          |
| H3                   |                    |           |                        |                |                                    | nd          | nd          |
| H4                   |                    |           |                        |                |                                    | 12.7±1.8    | 28.0±1.0    |
| H5                   | <i>Scaphoideus</i> | captured  | in                     | <i>titanus</i> | infected                           | nd          | nd          |
| H6                   |                    | vineyard  |                        |                |                                    | nd          | nd          |
| <b>Mean value±SD</b> |                    |           |                        |                |                                    | <b>10±4</b> | <b>28±3</b> |
| G                    | Other leafhoppers  |           |                        |                | Giaglione (TO). September 3. 2021  | nd          | nd          |
| K                    | Other leafhoppers  |           |                        |                | Giaglione (TO). September 3. 2021  | nd          | nd          |
| St_80                |                    |           | Adult                  |                | Grugliasco (TO). September 3. 2021 | nd          | nd          |
| St_81                |                    |           |                        |                |                                    | nd          | nd          |
| St_86                | <i>Scaphoideus</i> | captured  | in                     | <i>titanus</i> | 5 <sup>th</sup> instar             | nd          | nd          |
| St_101               |                    | vineyard  |                        | healthy        | Grugliasco (TO). September 3. 2021 | nd          | nd          |
| St_97                |                    |           |                        |                |                                    | nd          | nd          |
| St_98                |                    |           | 4 <sup>th</sup> instar |                | Grugliasco (TO). September 3. 2021 | nd          | nd          |
| SL1-10               | Symptomatic        | grapevine | -                      |                | Giaglione (TO). September 3. 2021  | 11.8±2.3    | 29.5±2.8    |
|                      | leaves             |           |                        |                |                                    |             |             |
| NSL1-10              | Non-symptomatic    | grapevine | -                      |                | Giaglione (TO). September 3. 2021  | 17±4        | 32±4        |
|                      | leaves             |           |                        |                |                                    |             |             |
| HL1-10               | Healthy            | grapevine | -                      |                | Grugliasco (TO). September 3. 2021 | nd          | nd          |
|                      | leaves             |           |                        |                |                                    |             |             |

\*Tp = Time to positive; \*\*Ct = threshold cycle; \*\*\*nd = not determined.
