# Supplementary material
Source: MDPI journal article supplement (https://www.mdpi.com/2073-4395/12/7/1645)
Supplement: s1 [file s1]

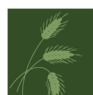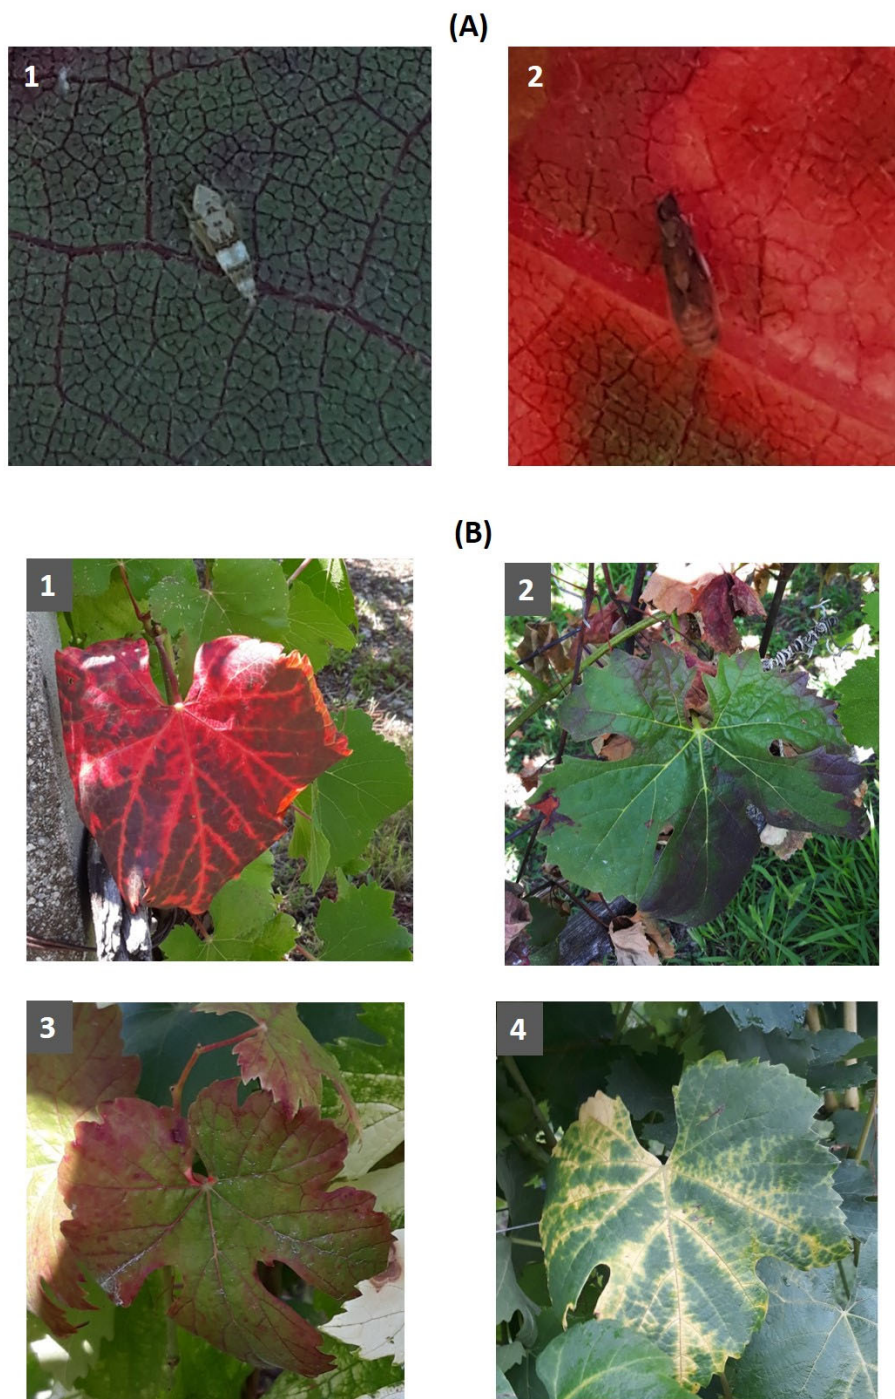

**Figure S1.** *S. titanus* and symptomatology observed on grapevine plants infected with FDp. (A) *S. titanus* instars: 5<sup>th</sup> nymphal instar (1) adult insect (2). (B) FD symptoms on red grapevine cultivars: red bands along the leaf veins in cv. Bequét (1), leaf reddening in cvs. Barbera (2) and Neretta cuneese (3), and yellow leaf veins on white grapevine cultivar Arneis (4). *S. titanus* insects (4<sup>th</sup> instar to adult) and grapevine leaf material were used for fast crude sap preparation for laboratory and in-field testing by the LAMP assay.
